# Supplementary material for: Taiji: System-level identification of key transcription factors reveals transcriptional waves in mouse embryonic development
Source: PubMed Central journal article supplement — Sci Adv. 2019 Mar 27;5(3):eaav3262. doi: 10.1126/sciadv.aav3262 (PMC6436936; doi:10.1126/sciadv.aav3262), 2019-03-27
Supplement: aav3262_SM.pdf [file aav3262_SM.pdf]

## Supplementary Materials for

### **Taiji: System-level identification of key transcription factors reveals transcriptional waves in mouse embryonic development**

Kai Zhang, Mengchi Wang, Ying Zhao, Wei Wang\*

\*Corresponding author. Email: [wei-wang@ucsd.edu](mailto:wei-wang@ucsd.edu)

Published 27 March 2019, *Sci. Adv.* **5**, eaav3262 (2019)

DOI: 10.1126/sciadv.aav3262

#### **The PDF file includes:**

Fig. S1. Validating the Taiji framework.

Fig. S2. The topological properties of genetic networks.

Fig. S3. PageRank scores (color shade) and expression levels (circle size) of 35 constitutively active TFs across 12 tissues and eight stages.

Fig. S4. Identification of driver TFs in 12 tissues.

Fig. S5. Identification of driver TFs in early mouse embryonic development, including two-, four-, and eight-cell stages, ICM, and ESC.

Fig. S6. Selecting algorithms and parameters for clustering analysis.

Fig. S7. Transcriptional waves direct tissue differentiation during mouse embryogenesis.

Table S1. Driver TFs in the heart.

Table S2. Driver TFs in the limb.

Table S3. Driver TFs in the liver.

Table S4. Driver TFs in the lung.

Table S5. Driver TFs in the kidney.

References (40–76)

#### **Other Supplementary Material for this manuscript includes the following:**

(available at [advances.sciencemag.org/cgi/content/full/5/3/eaav3262/DC1](https://advances.sciencemag.org/cgi/content/full/5/3/eaav3262/DC1))

Data file S1 (Microsoft Excel format). The accession numbers of datasets analyzed in this study.

Data file S2 (Microsoft Excel format). Germ layer-specific TFs and their *P* values.

Data file S3 (Microsoft Excel format). PageRank scores for all TFs across different stages and tissues.

Data file S4 (.zip format). Chromatin interaction predictions made by EpiTensor.

## **Supplementary Materials**

### **Literature evidence supports identified driver TFs**

Here we list the supporting evidence for the identified driver TFs in five tissues, including heart, limb, liver, lung and kidney. The rest of the tissues (neural tube, forebrain, hindbrain, midbrain, craniofacial, stomach and intestine) are either less studied or closely related to each other (functionally and spatially), which makes it very difficult to assess their tissue specificity.

8 out of 11 (72.7%) predicted driver TFs in heart are supported by literature (Table S1). 8 out of 10 (80%) predicted driver TFs in limb are supported by literature (Table S2). 7 out of 11 (63.6%) predicted driver TFs in liver are supported by literature (Table S3). 11 out of 13 (84.6%) predicted driver TFs in lung are supported by literature (Table S4). 7 out of 10 (70%) predicted driver TFs in kidney are supported by literature (Table S5).

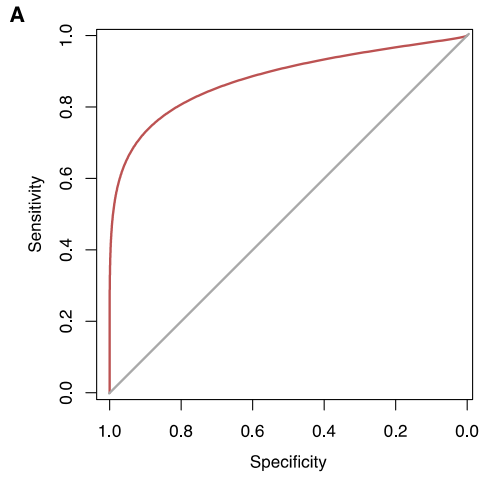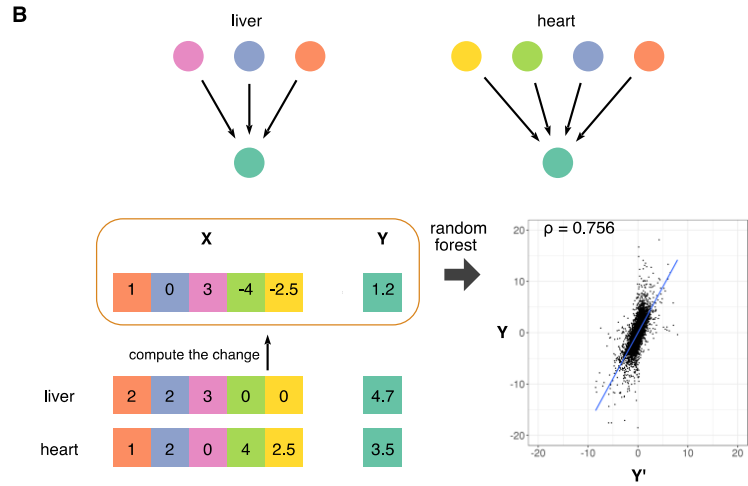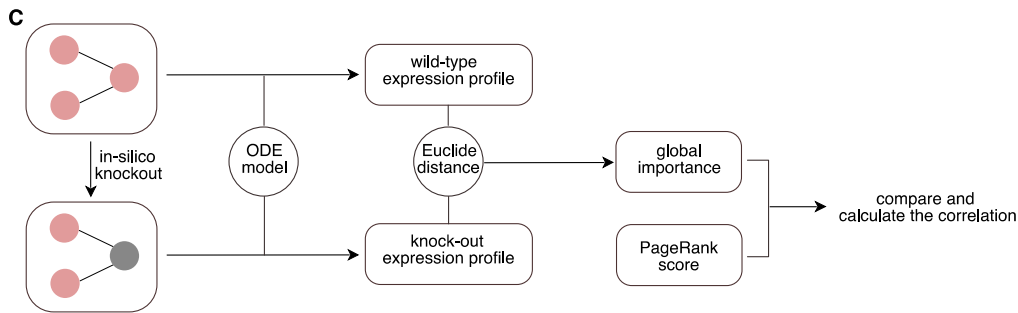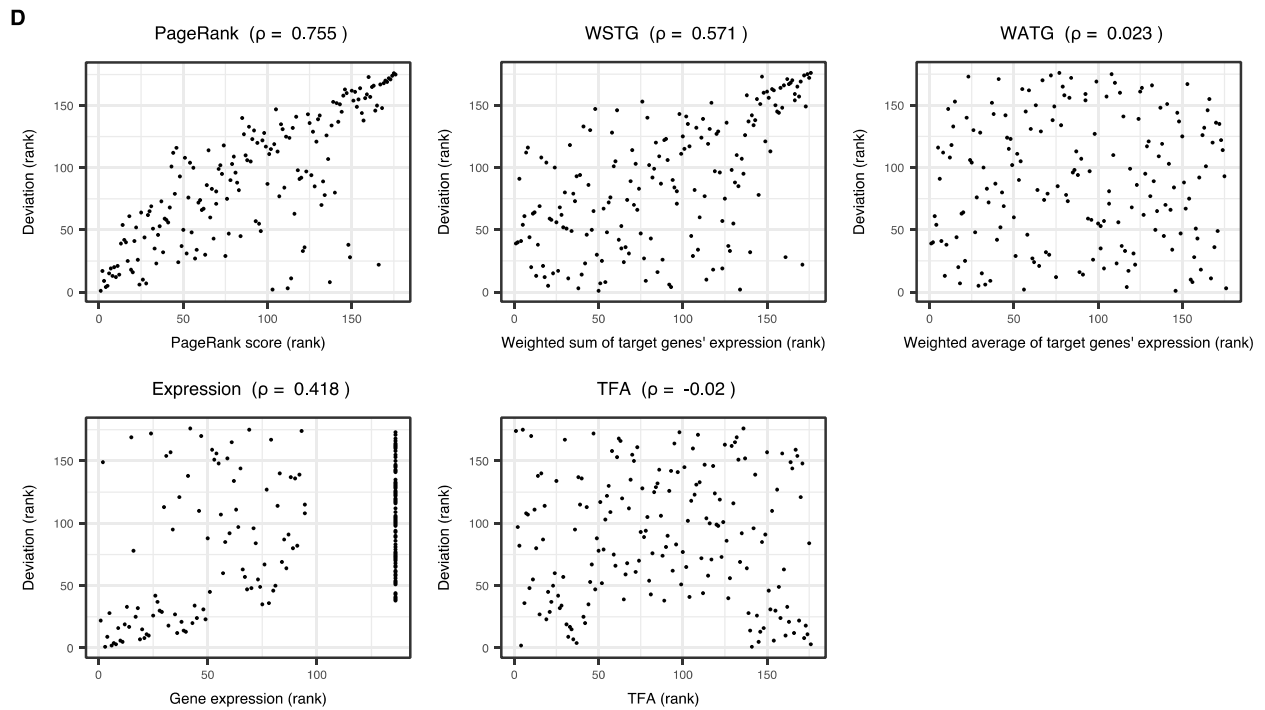

**Fig. S1. Validating the Taiji framework.** (A) Comparing EpiTensor's predictions with Hi-C interactions in mESC. The AUC is 0.87. (B) An illustration of the network validation process. The log-fold expression changes of genes and their regulators between two tissues were computed and used to train a random forest model. The performance was assessed by the Spearman's correlation between predictions and "ground truth" with 10-fold cross-validation. The average correlation is 0.756. (C) The workflow of the in-silico benchmark process for assessing PageRank's performance on predicting TFs' global importance. (D) Comparing different ranking methods in E. coli network.



**Fig. S2. The topological properties of genetic networks.** (A) The number of edges (top) and nodes (bottom) in each genetic network. (B) The distribution of the number of regulators per gene for each genetic network. (C) The distribution of the number of regulatees per TF for each genetic network.

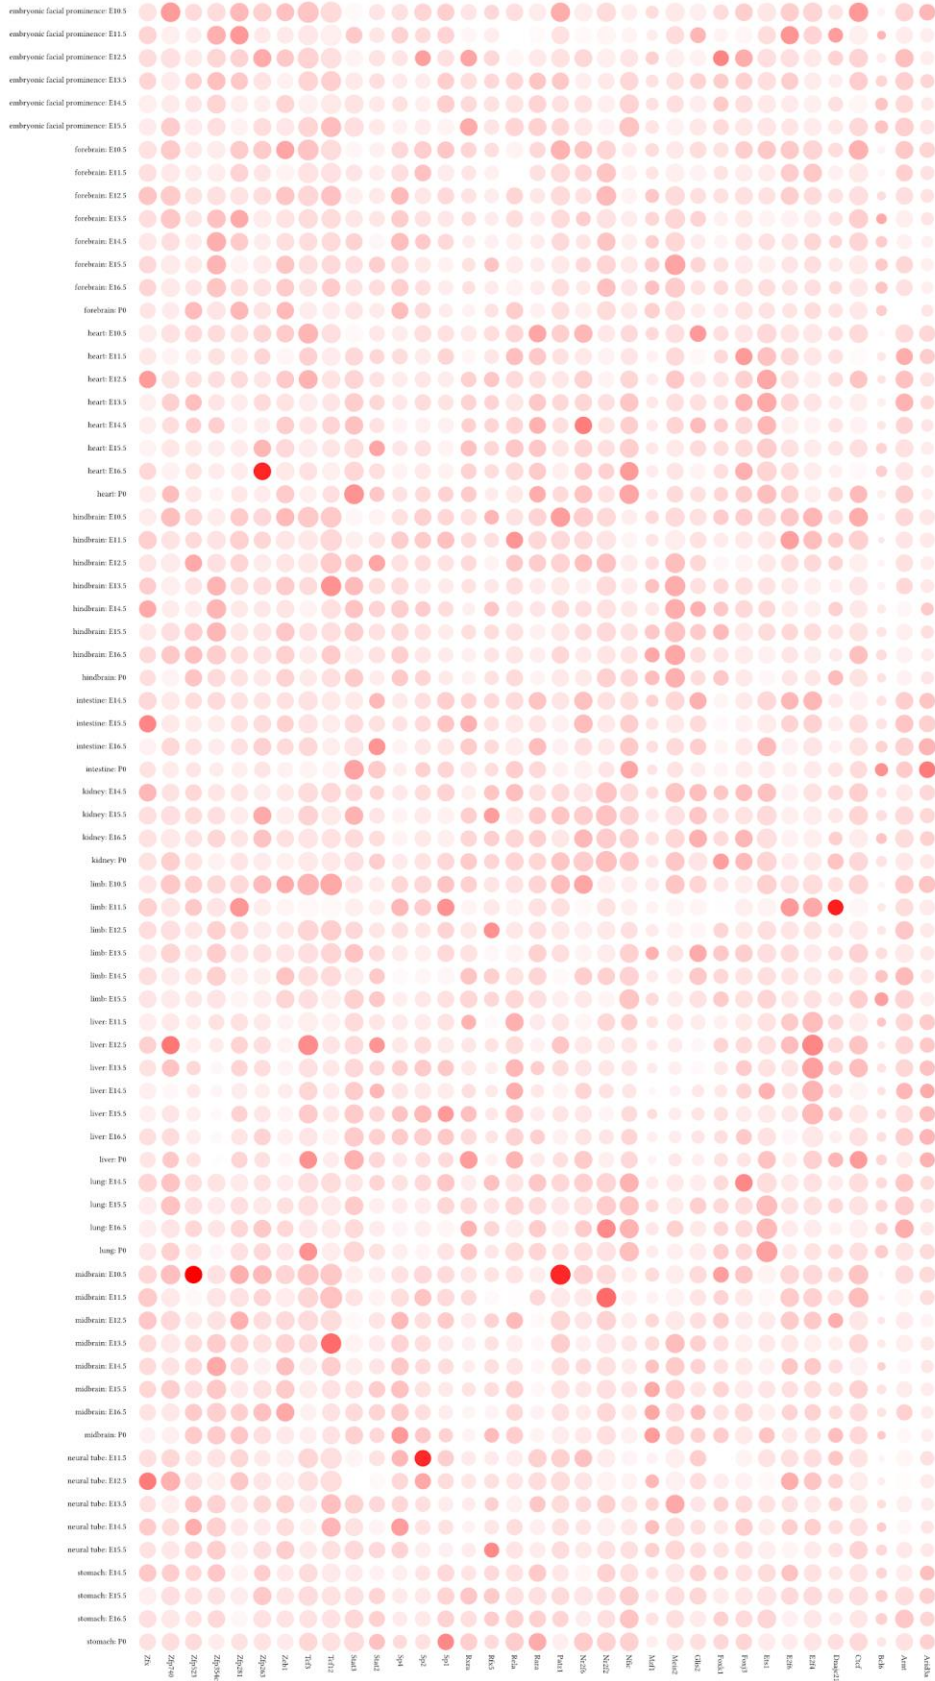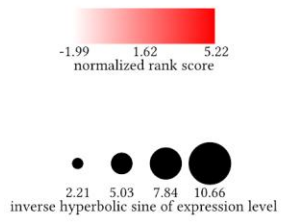

**Fig. S3. PageRank scores (color shade) and expression levels (circle size) of 35 constitutively active TFs across 12 tissues and eight stages.**



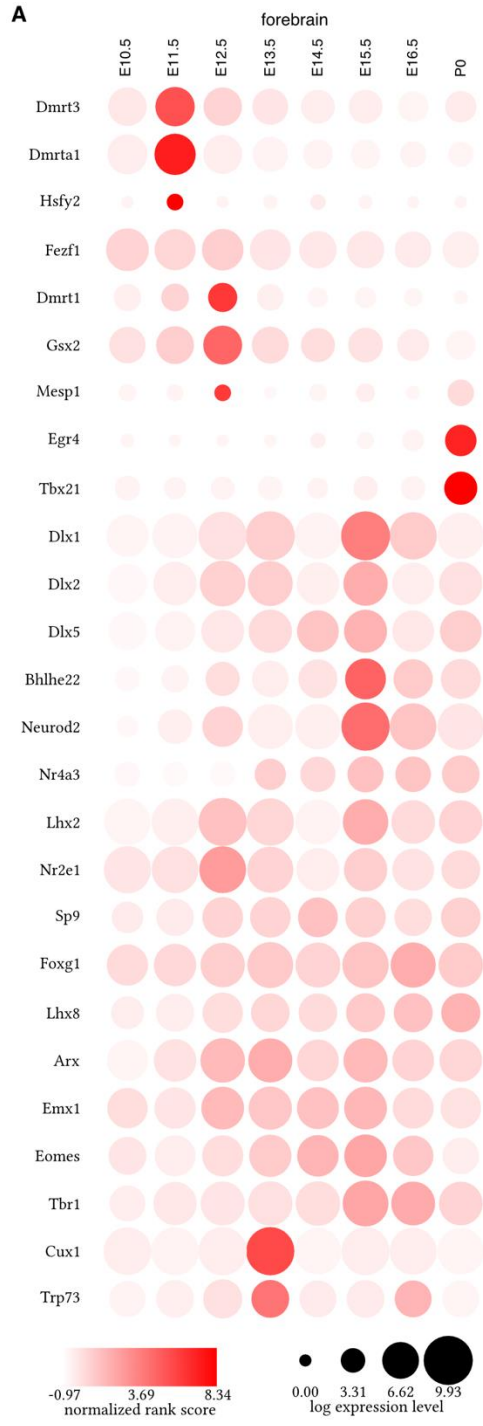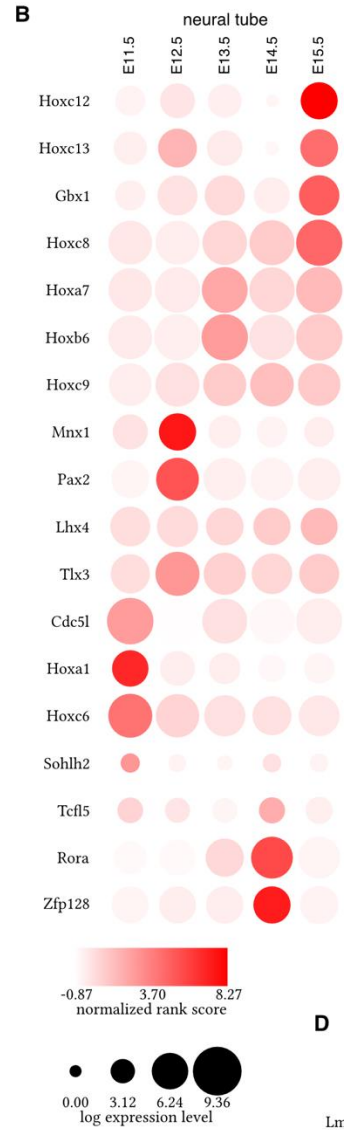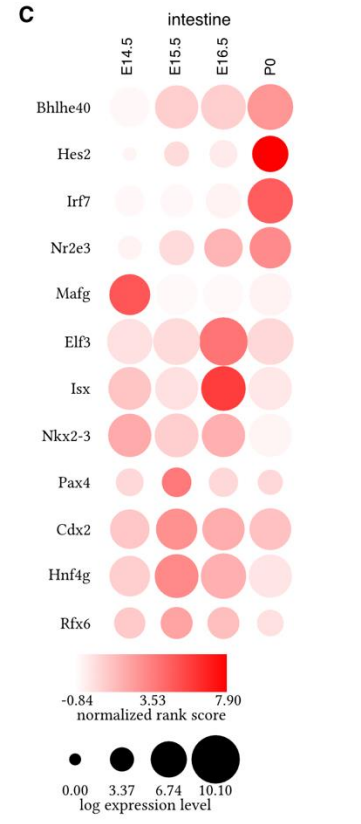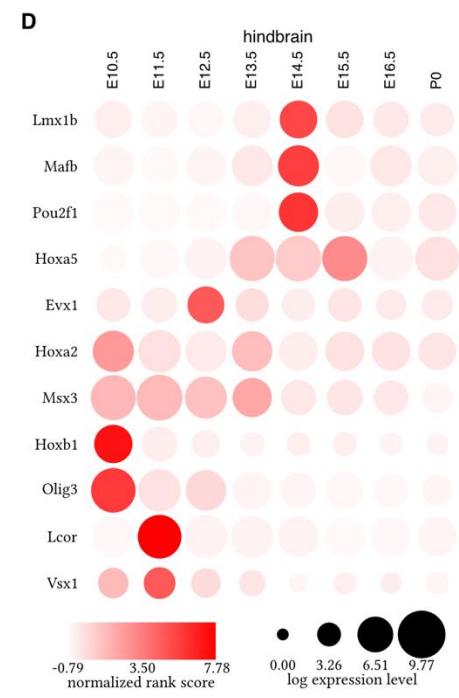

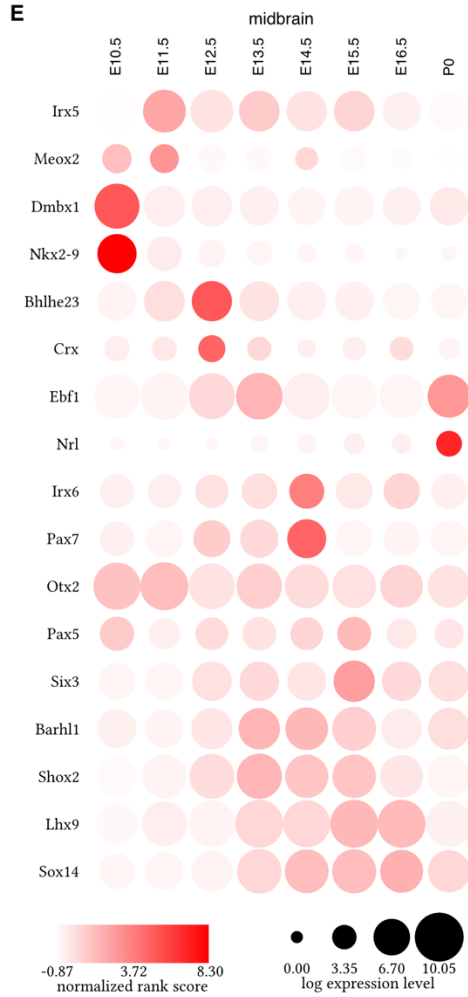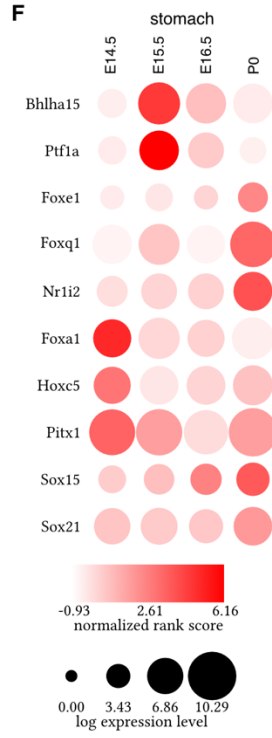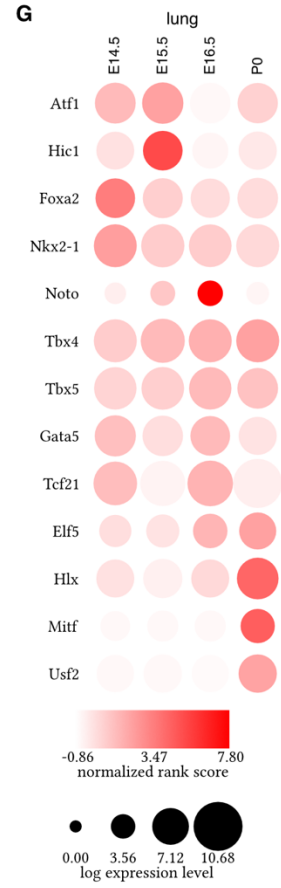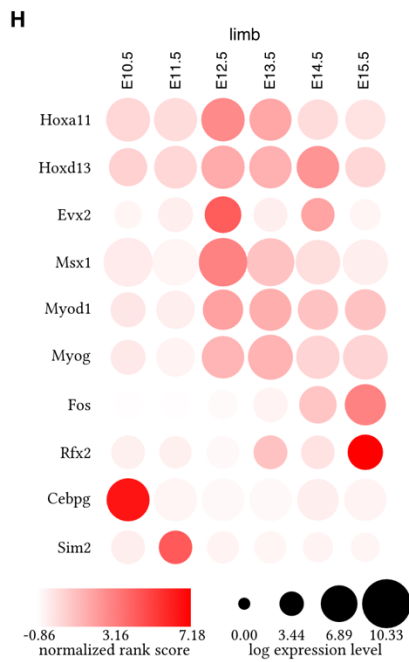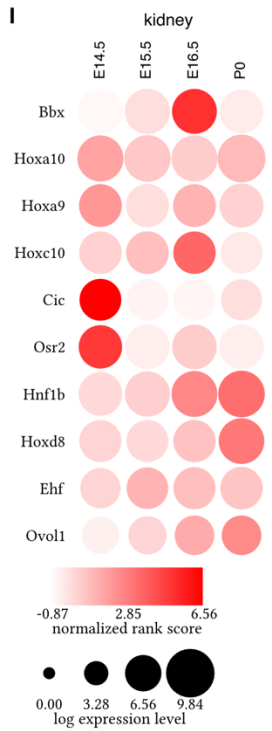

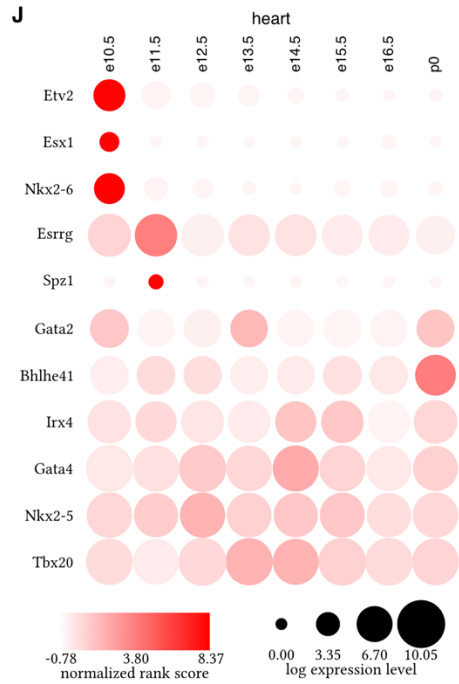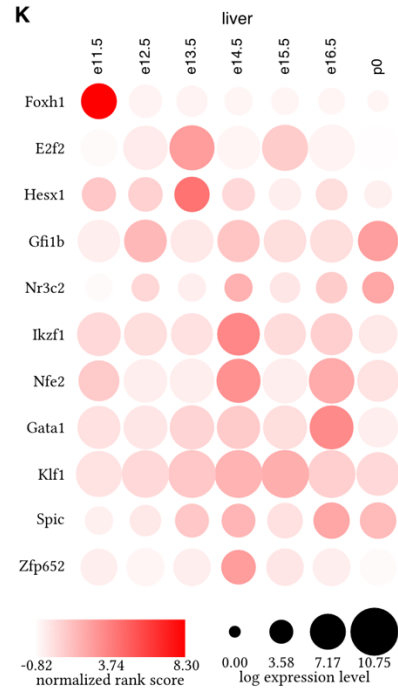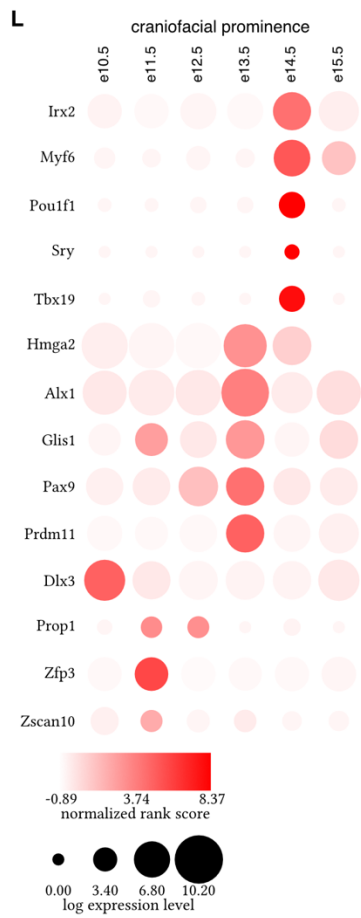

**Fig. S4. Identification of driver TFs in 12 tissues.** (A) forebrain. (B) neural tube. (C) intestine. (D) hindbrain. (E) midbrain. (F) stomach. (G) lung. (H) limb. (I) kidney. (J) heart. (K) liver. (L) craniofacial prominence.

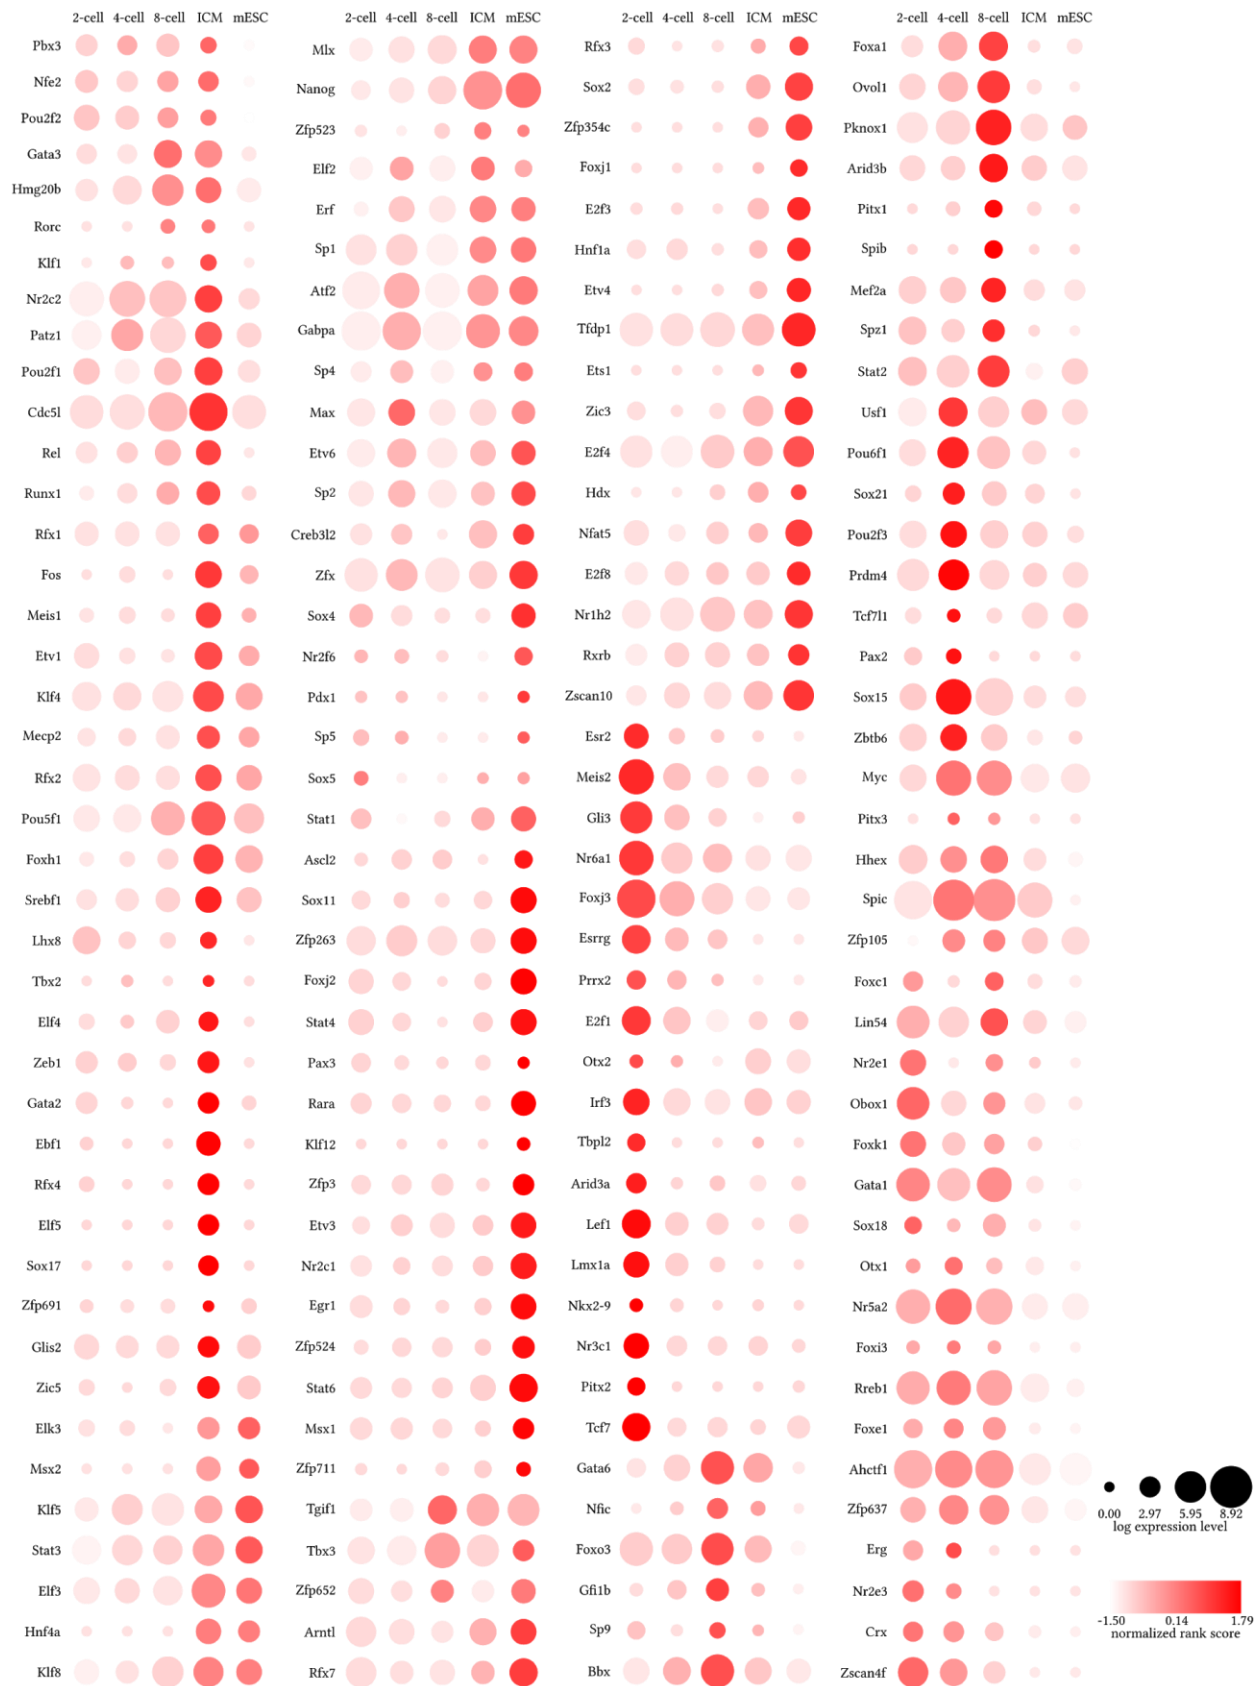

**Fig. S5. Identification of driver TFs in early mouse embryonic development, including two-, four-, and eight-cell stages, ICM, and ESC.**

**A**

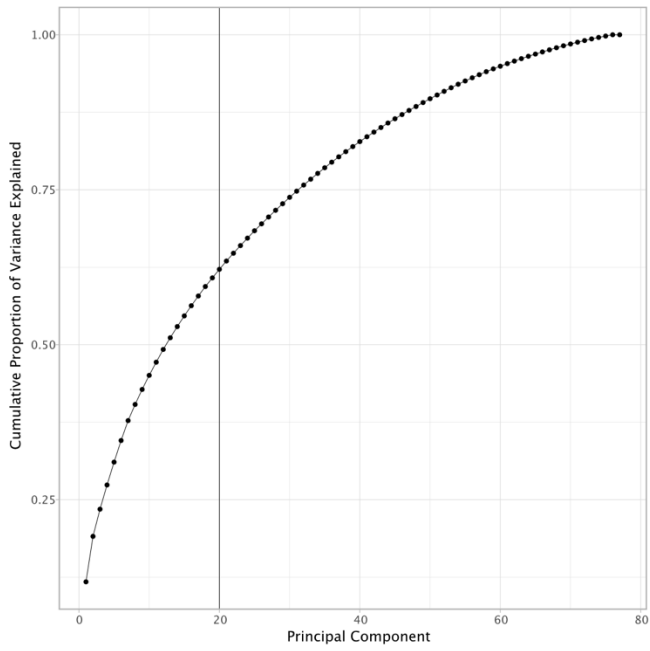

**B**

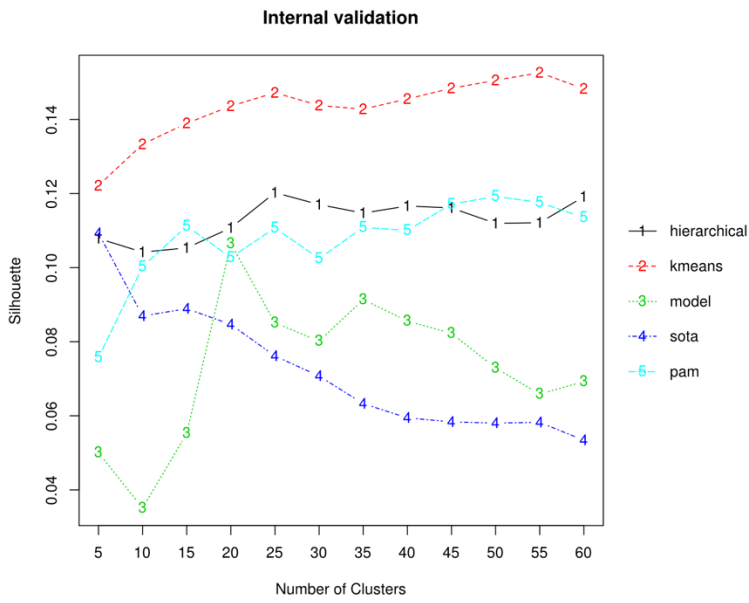

**Fig. S6. Selecting algorithms and parameters for clustering analysis.** (A) Plotting the cumulative proportion of variance explained against the number of principal components (PCs). The first 20 PCs were kept according to the “elbow” method. (B) Selecting the best clustering algorithm and number of clusters according to the Silhouette metric. The k-means algorithm (k = 25) was picked using the “elbow” method. hierarchical, hierarchical clustering algorithm; kmeans, k-means algorithm; model, model-based algorithm; sota, self-organizing tree algorithm; pam, partitioning around medoids algorithm.



C1

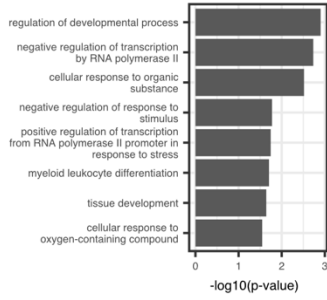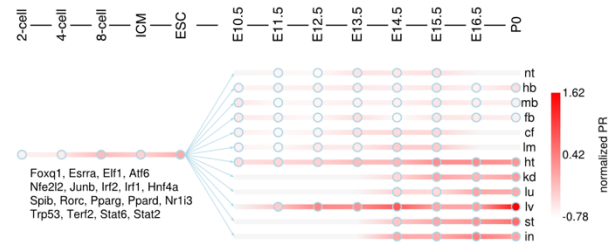

C2

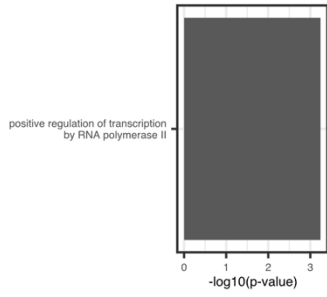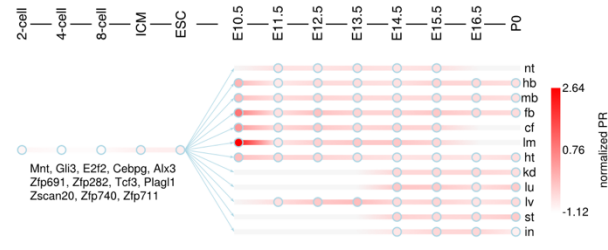

C3

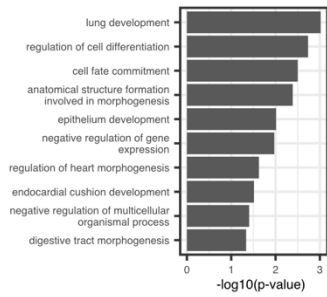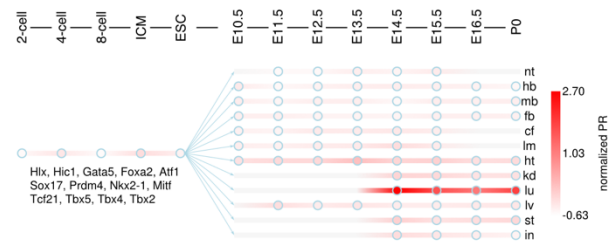

C4

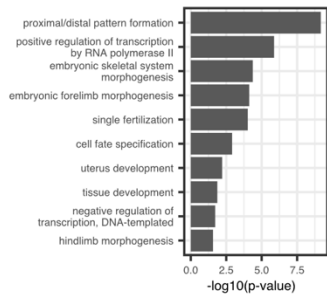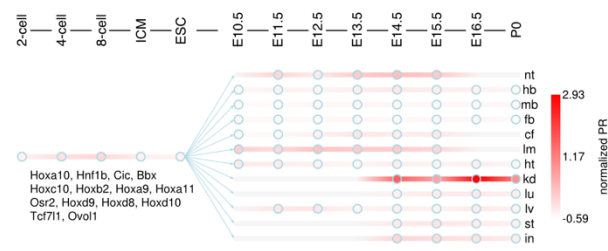

C5

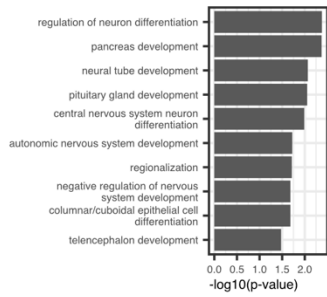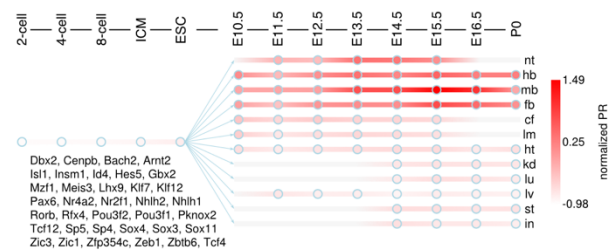

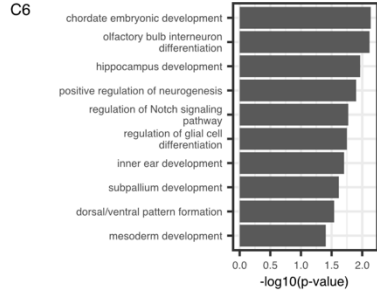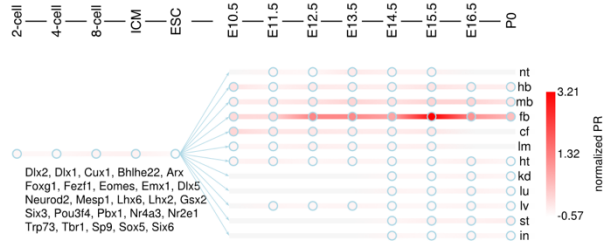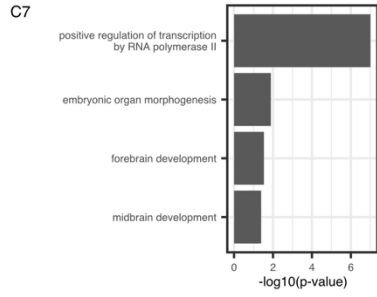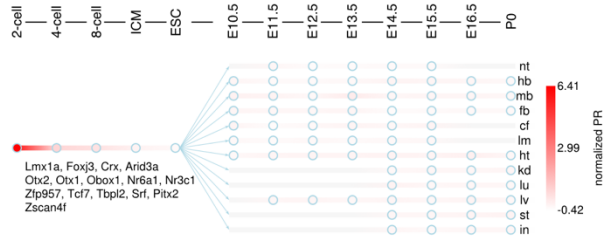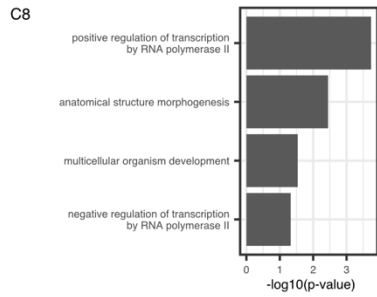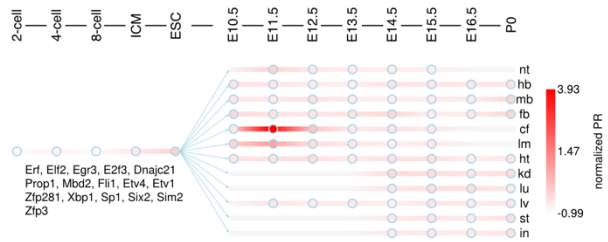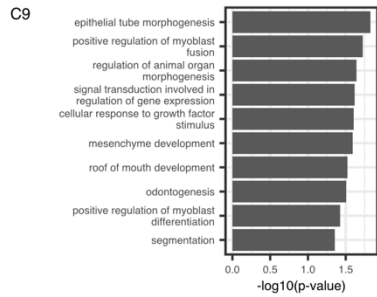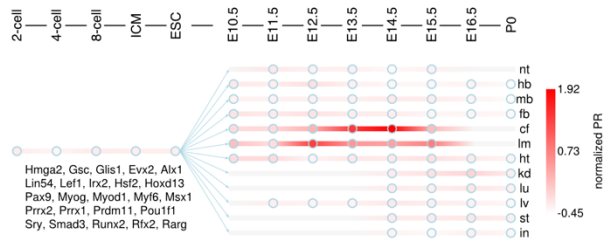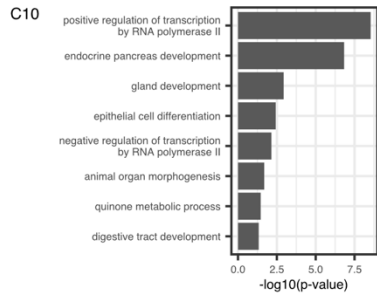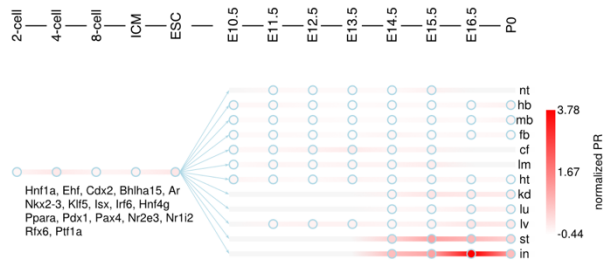

C11

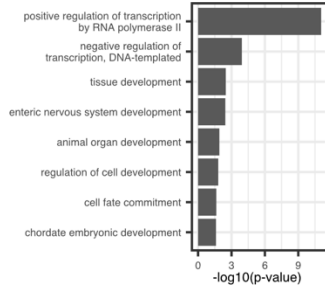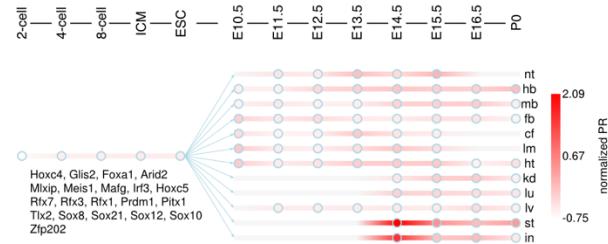

C12

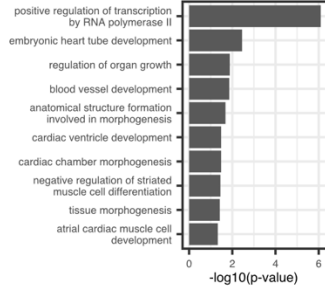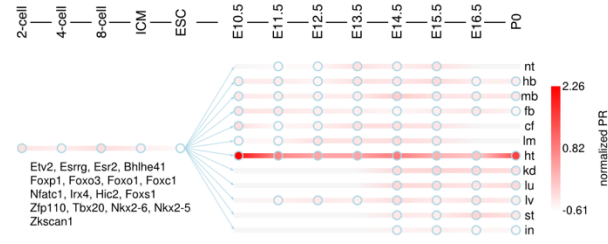

C13

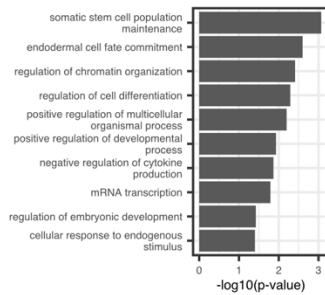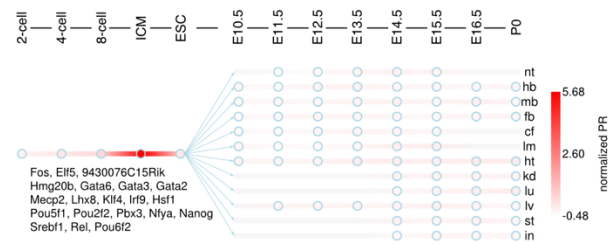

C14

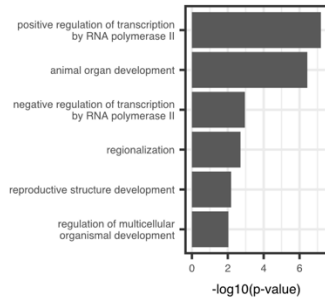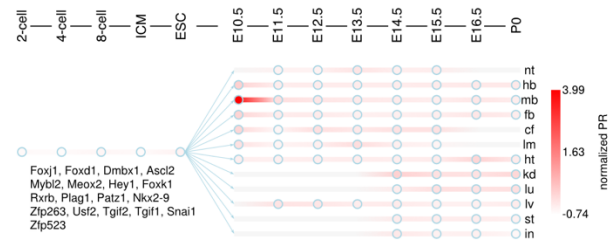

C15

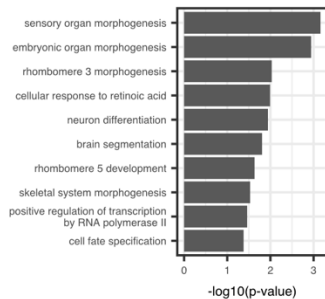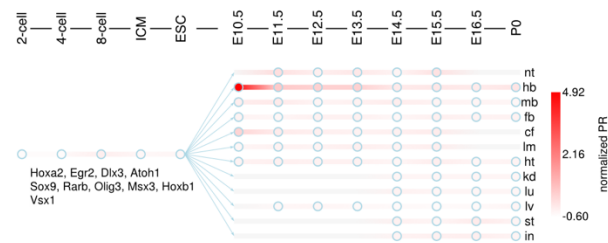

C16

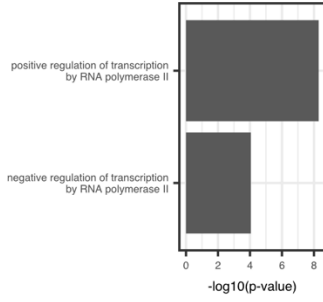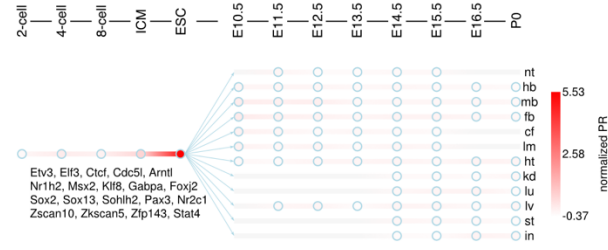

C17

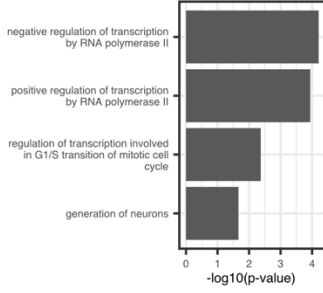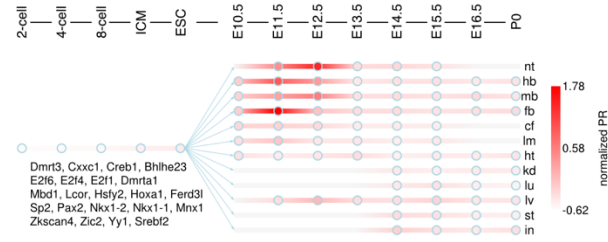

C18

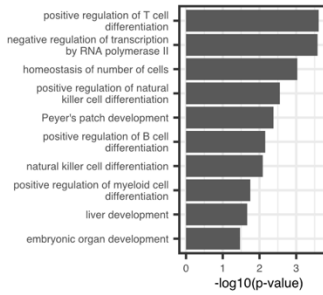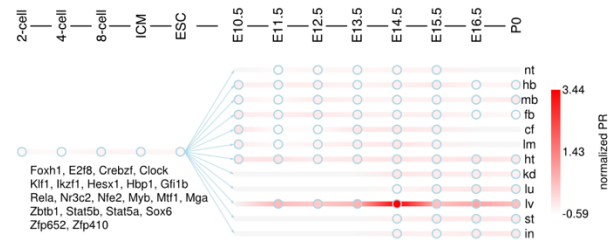

C19

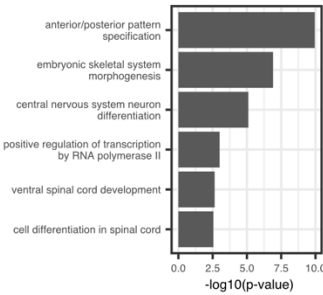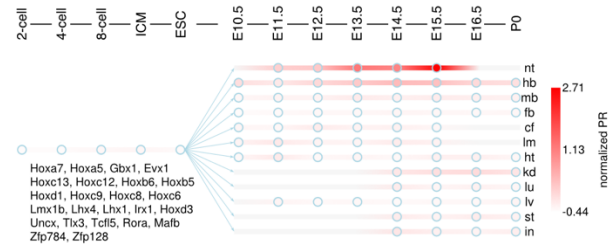

C20

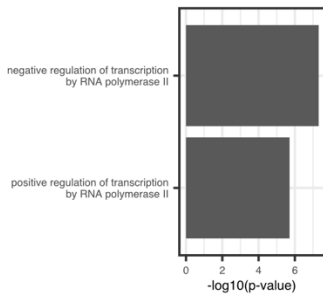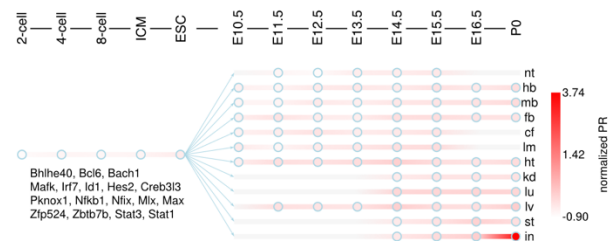

C21

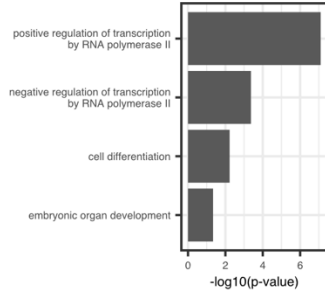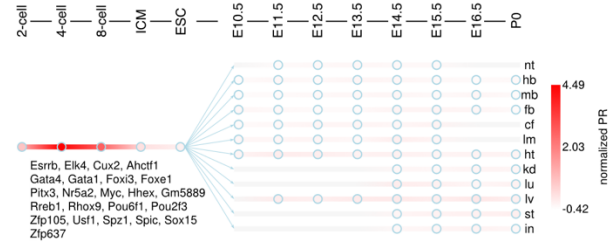

C22

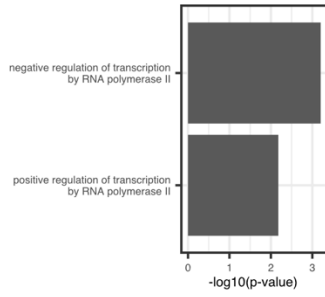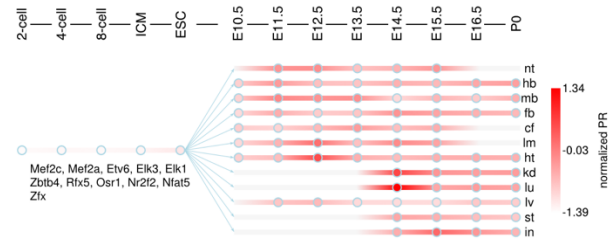

C23

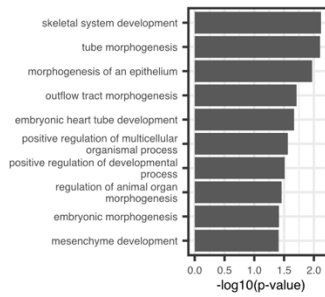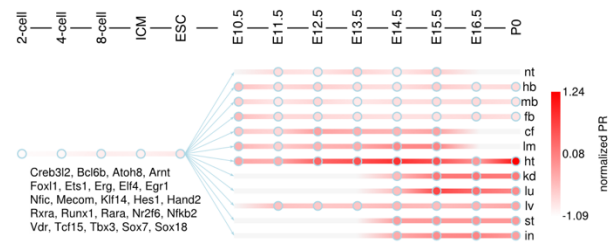

C24

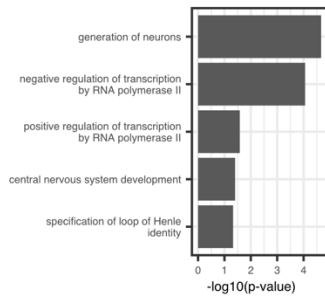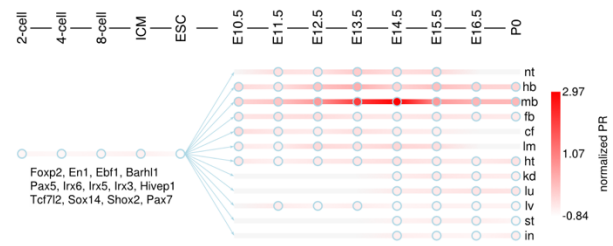

C25

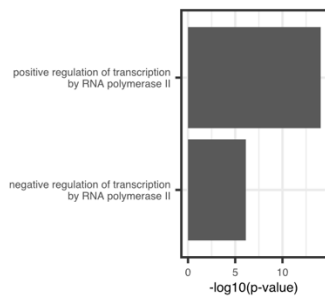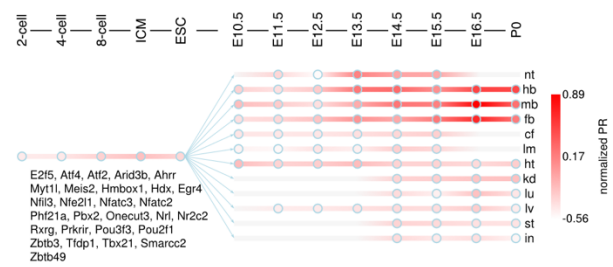

**Fig. S7. Transcriptional waves direct tissue differentiation during mouse embryogenesis.**

**Table S1. Driver TFs in the heart.**

| Predicted driver TFs | Evidence                                |
|----------------------|-----------------------------------------|
| Etv2                 | Affect heart development (40)           |
| Esx1                 | Unknown                                 |
| Nkx2-6               | Relate to congenital heart disease (41) |
| Bhlhe41              | Unknown                                 |
| Gata2                | Relate to coronary artery disease (42)  |
| Gata4                | Essential for heart development (43)    |
| Nkx2-5               | Relate to heart development (44)        |
| Tbx20                | Essential for heart development (45)    |
| Esrrg                | Affect heart development (46)           |
| Spz1                 | Unknown                                 |
| Irx4                 | Affect heart development (47)           |

**Table S2. Driver TFs in the limb.**

| Predicted driver TFs | Evidence                                       |
|----------------------|------------------------------------------------|
| Hoxa11               | Relate to limb development (48)                |
| Hoxa13               | Relate to limb development (48)                |
| Evx2                 | Important for limb development (49)            |
| Msx1                 | Important for limb development (50)            |
| Myod1                | Important for limb development (51)            |
| Myog                 | Important for limb development (52)            |
| Sim2                 | Affect limb development (53)                   |
| Fos                  | Relate to limb mesenchymal chondrogenesis (54) |
| Rfx2                 | Unknown                                        |
| Cebpg                | Unknown                                        |

**Table S3. Driver TFs in the liver.**

| Predicted driver TFs | Evidence                             |
|----------------------|--------------------------------------|
| Gfi1b                | Relate to liver development (55)     |
| Nr3c2                | Unknown                              |
| Ikzf1                | Relate to liver cancer (56)          |
| Nfe2                 | Important for liver function (57)    |
| Gata1                | Important for liver development (58) |
| Klf1                 | Relate to liver development (59)     |
| Spic                 | Relate to liver development (60)     |
| E2f2                 | Important for liver function (61)    |
| Hesx1                | Unknown                              |
| Zfp652               | Unknown                              |
| Foxh1                | Unknown                              |

**Table S4. Driver TFs in the lung.**

| Predicted driver TFs | Evidence                                 |
|----------------------|------------------------------------------|
| Tcf21                | Important for heart development (62)     |
| Usf2                 | Relate to heart development (63)         |
| Gata5                | Important for heart development (64)     |
| Foxa2                | Important for heart development (65)     |
| Nkx2-1               | Essential for heart development (66, 67) |
| Mitf                 | Relate to heart cancer (20)              |
| Elf5                 | Relate to heart development (68)         |
| Tbx4                 | Important for heart development (69)     |
| Hic1                 | Relate to heart cancer (19)              |
| Atf1                 | Important for heart development (70)     |
| Tbx5                 | Important for heart development (69)     |
| Noto                 | Unknown                                  |
| Hlx                  | Unknown                                  |

**Table S5. Driver TFs in the kidney.**

| Predicted driver TFs | Evidence                                                                   |
|----------------------|----------------------------------------------------------------------------|
| Hoxd8                | Relate to kidney development (71)                                          |
| Osr2                 | Relate to early pectoral fin specification and pronephric development (72) |
| Ovol1                | Relate to kidney development (73)                                          |
| Hnf1b                | Relate to kidney disease (74)                                              |
| Bbx                  | Relate to kidney development (75)                                          |
| Hoxa10               | Important for kidney development (76)                                      |
| Hoxc10               | Important for kidney development (76)                                      |
| Cic                  | Unknown                                                                    |
| Hoxa9                | Unknown                                                                    |
| Ehf                  | Unknown                                                                    |
